# Supplementary material for: Climate-Induced Non-Economic Loss and Damage: Understanding Policy Responses, Challenges, and Future Directions in Pacific Small Island Developing States
Source: MDPI journal article supplement (doi:10.3390/cli11030074), 2023-03-20
Supplement: s1 [file s1]

Archive with 1 entries (1 files):
- climate-2226178-supplementary-d.pdf
