# Supplementary material for: Climate-Induced Non-Economic Loss and Damage: Understanding Policy Responses, Challenges, and Future Directions in Pacific Small Island Developing States
Source: MDPI journal article supplement (doi:10.3390/cli11030074), 2023-03-20
Supplement: s1 [file s1 › climate-2226178-supplementary-d.pdf]

## Supplementary Information

**Supplementary Information: Table S1.** Role of stakeholders in addressing non-economic losses in the region (where 1= no role and 5= extensive role). Overall mean is first displayed (column 1), which is then split by gender (column 2) and the institution participants work for (column 3).

| Stakeholders                                       | Overall mean (n=39) | Gender (n=37) |      | Institution (n=39) |       |
|----------------------------------------------------|---------------------|---------------|------|--------------------|-------|
|                                                    |                     | Female        | Male | Government         | Other |
| National government                                | 3.92                | 4.07          | 3.91 | 3.93               | 3.92  |
| Non-governmental organisations                     | 3.85                | 4.07          | 3.73 | 3.71               | 3.92  |
| Community-based organisations                      | 3.72                | 3.87          | 3.73 | 3.43               | 3.88  |
| Intergovernmental organisations                    | 3.64                | 3.80          | 3.59 | 3.29               | 3.84  |
| Faith-based organisations                          | 3.62                | 3.80          | 3.64 | 3.07               | 3.92  |
| Indigenous peoples                                 | 3.62                | 3.80          | 3.68 | 3.21               | 3.84  |
| Academic, scientific and research entities         | 3.59                | 3.53          | 3.68 | 3.57               | 3.60  |
| Provincial councils and local government           | 3.59                | 3.67          | 3.64 | 3.57               | 3.60  |
| Women and women's groups                           | 3.44                | 3.60          | 3.50 | 2.93               | 3.72  |
| Youth                                              | 3.41                | 3.67          | 3.41 | 2.93               | 3.68  |
| Volunteers and organised voluntary organisations   | 3.26                | 3.47          | 3.27 | 2.79               | 3.52  |
| Persons with disabilities and their organisations  | 3.21                | 3.53          | 3.14 | 2.79               | 3.44  |
| Business and private sector financial institutions | 3.13                | 3.20          | 3.09 | 2.93               | 3.24  |
| Older persons/Elders                               | 3.05                | 3.20          | 3.09 | 2.43               | 3.40  |
| Other                                              | 2.50                | 0             | 2.50 | 2.50               | 0     |

## NELD Pacific Stakeholders Survey

### PARTICIPANT INFORMATION SHEET & CONSENT

*We welcome your participation in this questionnaire on non-economic loss and damage from climate change in the Pacific Islands region.*

**Researchers:** Karen McNamara (The University of Queensland), Rachel Clissold (The University of Queensland), Ross Westoby (Griffith University) and Alvin Chandra (United Nations Environment Programme and The University of Queensland)

#### **Purpose**

The purpose of this research is to explore stakeholder perspectives on non-economic loss and damage from climate change in the Pacific Islands region: how they are considered, planned for, and addressed. Non-economic loss and damage from climate change is generally intangible and hard to quantify and place a monetary value on but are of vital importance to Pacific communities.

#### **What is involved?**

If you agree to participate, you will be asked to complete an online questionnaire. This will take about 20-30 minutes to complete.

#### **Confidentiality and participation**

Your responses will be completely confidential. We will not be able to identify you in any data collected, stored, or analysed.

Participation in this study is entirely voluntary. You are welcome to leave the online platform at any time if you do not feel comfortable being involved in this study.

#### **Getting in touch and ethics**

If you would like more information about this study, please contact Karen McNamara via email [REDACTED] or phone [REDACTED].

This study adheres to the guidelines of the ethical review process of the University of Queensland and the National Statement on Ethical Conduct in Human Research.

Whilst you are free to discuss your participation in this study with project staff (contact details above), if you would like to speak to an officer of the University not involved in the study, you may contact the Ethics Coordinator on [REDACTED].

#### **Consent**

If you wish to participate in this questionnaire, please click 'Next' below and complete the questionnaire that follows. If not, please close this [web browser](#).

## NELD Pacific Stakeholders Survey

### 1. Please indicate the type of institution you work for (please select only one response):

- ☐ Pacific Island national government ministry or department
- ☐ Pacific Island local government
- ☐ Donor, UN Agency or development partner
- ☐ Intergovernmental organisation, including regional CROP agencies
- ☐ Non-governmental organisation
- ☐ Civil society (i.e., faith-based organisations, community-based organisations)
- ☐ Youth group
- ☐ Private sector
- ☐ Other \_\_\_\_\_

### 2. How does your work relate to climate change (please select only one response)?

- ☐ Mitigation
- ☐ Adaptation
- ☐ Disaster preparedness, emergency response, recovery
- ☐ Sustainable development
- ☐ Loss and damage
- ☐ Other \_\_\_\_\_

### 3. Where does your work mainly focus (please select only one response)?

- ☐ Local/Community/Municipal
- ☐ District – Specific provinces
- ☐ National – Entire country
- ☐ Regional – Entire Pacific Islands region
- ☐ Other \_\_\_\_\_

### 4. What work do you mostly pursue (please select only one response)?

- ☐ On-the-ground practice
- ☐ Policy development
- ☐ Education and training
- ☐ Capacity building
- ☐ Finance
- ☐ Social Protection
- ☐ Humanitarian
- ☐ Technology
- ☐ Research
- ☐ Activism
- ☐ Other \_\_\_\_\_

### 5. How do you understand the term 'non-economic loss and damage' (NELD)? Please explain what it means in the Pacific Islands context and give examples where possible.

---

---

The following categories of non-economic loss and damage (NELD) come from a technical paper by the UNFCCC Secretariat (2013) and other literature (i.e. Morrissey and Oliver-Smith, 2013). Please add to these categories in 'Other'.

**6. We want to understand the level at which various types of non-economic loss and damage (NELD) might be occurring or expected to occur in the Pacific Islands region.**

Please indicate to what extent each of the NELD types are being experienced and then the likelihood of each NELD type occurring in the future (2050 and 2100) (where 1=low; 2=medium; 3=high). Also indicate if these NELD types are avoidable or reparable (Yes/No).

| <b>NELD types</b>                                                                                                                                       | <b>Already occurring now</b><br>(1=low;<br>2=medium;<br>3=high) | <b>Expected by 2050</b><br>(1=low;<br>2=medium;<br>3=high) | <b>Expected by 2100</b><br>(1=low;<br>2=medium;<br>3=high) | <b>Avoidable</b><br>(Yes/No) | <b>Reparable</b><br>(Yes/No) |
|---------------------------------------------------------------------------------------------------------------------------------------------------------|-----------------------------------------------------------------|------------------------------------------------------------|------------------------------------------------------------|------------------------------|------------------------------|
| <i>Human life<br/>(violation of the right to life)</i>                                                                                                  |                                                                 |                                                            |                                                            |                              |                              |
| <i>Human health<br/>(impinging on physical, mental, emotional and social wellbeing)</i>                                                                 |                                                                 |                                                            |                                                            |                              |                              |
| <i>Human mobility<br/>(movements in the form of migration, displacement, or relocation)</i>                                                             |                                                                 |                                                            |                                                            |                              |                              |
| <i>Territory<br/>(restrictions on access to territory or ceding exclusive economic zones)</i>                                                           |                                                                 |                                                            |                                                            |                              |                              |
| <i>Culture &amp; heritage<br/>(pressure on culture, restrictions on access to cultural items and impacts on cultural sites or historical buildings)</i> |                                                                 |                                                            |                                                            |                              |                              |
| <i>Indigenous &amp; local knowledge<br/>(tacit and</i>                                                                                                  |                                                                 |                                                            |                                                            |                              |                              |

|                                                                                                                                   |  |  |  |  |  |
|-----------------------------------------------------------------------------------------------------------------------------------|--|--|--|--|--|
| <i>embedded knowledge that is spiritually or culturally grounded)</i>                                                             |  |  |  |  |  |
| <i>Biodiversity (intrinsic value of species)</i>                                                                                  |  |  |  |  |  |
| <i>Ecosystem services (services provided by ecosystems through supplying, provisioning, regulating and culturally supporting)</i> |  |  |  |  |  |
| <i>Place attachment &amp; sense of place (connection to one's homeplace)</i>                                                      |  |  |  |  |  |
| <i>Social cohesion (the bonds and bridges that bind groups of people together)</i>                                                |  |  |  |  |  |
| <i>Agency (capacity to be and act individually or as a group)</i>                                                                 |  |  |  |  |  |
| <i>Identity (sense of oneself in respect to the world around them)</i>                                                            |  |  |  |  |  |
| <i>Other _____</i>                                                                                                                |  |  |  |  |  |
| <i>Other _____</i>                                                                                                                |  |  |  |  |  |

**7. For three most significant NELD types that you ranked 'high', can you explain your reasoning and provide examples where possible? Can you also indicate what climate change impacts are driving these 'high' NELD types?**

-----  
-----

**8. Which of the above NELD types in Q6 do you value most, and which of them are you most and least concerned about?**

-----  
-----

**9. To what degree and in what ways do the following vulnerable groups experience NELD in the Pacific region?**

Women: \_\_\_\_\_  
 Youth and children: \_\_\_\_\_  
 People living with disabilities: \_\_\_\_\_  
 Indigenous peoples: \_\_\_\_\_  
 Older persons: \_\_\_\_\_  
 Other: \_\_\_\_\_

**10. Do you think there are gaps in our knowledge about NELD from climate change in the Pacific region? For example, the gaps might be in terms of what losses and damages exist, how they occur and/or how to address them.**

☐ No, there are no gaps    ☐ Yes, some gaps exist    ☐ Yes, extensive gaps exist

**11. If there are gaps, can you explain what these knowledge gaps are?**

\_\_\_\_\_  
 \_\_\_\_\_

**12. Please describe how the Pacific region or individual Pacific Island countries are planning for NELD from climate change:**

\_\_\_\_\_  
 \_\_\_\_\_

**13. Are there any local, national or regional policies that identify, assess and address NELD from climate change? If so, please describe them. If not, please indicate if there are plans for this.**

\_\_\_\_\_  
 \_\_\_\_\_

**14. How much of a role do the following stakeholders have in addressing NELD (i.e. helping people work through NELD) from climate change in the Pacific region at present?**

| <i><b>Stakeholders</b></i>                         | <i><b>None</b></i> | <i><b>A little</b></i> | <i><b>Moderate</b></i> | <i><b>A lot</b></i> | <i><b>Extensive</b></i> |
|----------------------------------------------------|--------------------|------------------------|------------------------|---------------------|-------------------------|
| National government                                |                    |                        |                        |                     |                         |
| Provincial councils and Local government           |                    |                        |                        |                     |                         |
| Academic, scientific and research entities         |                    |                        |                        |                     |                         |
| Business and private sector financial institutions |                    |                        |                        |                     |                         |
| Community-based organisations                      |                    |                        |                        |                     |                         |
| Faith-based organisations                          |                    |                        |                        |                     |                         |
| Non-governmental organisations                     |                    |                        |                        |                     |                         |
| Intergovernmental organisations                    |                    |                        |                        |                     |                         |
| Volunteers and organised voluntary organisations   |                    |                        |                        |                     |                         |
| Older persons/Elders                               |                    |                        |                        |                     |                         |
| Youth                                              |                    |                        |                        |                     |                         |
| Women and women's groups                           |                    |                        |                        |                     |                         |
| Indigenous peoples                                 |                    |                        |                        |                     |                         |

|                                                   |  |  |  |  |  |
|---------------------------------------------------|--|--|--|--|--|
| Persons with disabilities and their organisations |  |  |  |  |  |
| Other _____                                       |  |  |  |  |  |

**15. Reflecting on the stakeholders who are currently addressing NELD, which stakeholders should become more engaged in helping to work through NELD in the future? Why?**

-----

-----

**16. Which stakeholders do you think are most responsible for gathering data on and tracking NELD in the Pacific region? How should they be collecting data on NELD?**

-----

-----

**17. How appropriate and useful are the following ways for people to address and work through these NELD in the Pacific region?**

| <i><b>Ways for people to work through loss</b></i>    | <i><b>Not appropriate or useful</b></i> | <i><b>A little appropriate and useful</b></i> | <i><b>Moderately appropriate and useful</b></i> | <i><b>Very appropriate and useful</b></i> | <i><b>Extremely appropriate and useful</b></i> |
|-------------------------------------------------------|-----------------------------------------|-----------------------------------------------|-------------------------------------------------|-------------------------------------------|------------------------------------------------|
| Advocacy on behalf of vulnerable groups               |                                         |                                               |                                                 |                                           |                                                |
| Artwork                                               |                                         |                                               |                                                 |                                           |                                                |
| Body-based therapies (e.g. breathing work)            |                                         |                                               |                                                 |                                           |                                                |
| Books                                                 |                                         |                                               |                                                 |                                           |                                                |
| Ceremonies and rituals                                |                                         |                                               |                                                 |                                           |                                                |
| Community activities                                  |                                         |                                               |                                                 |                                           |                                                |
| Community theatre                                     |                                         |                                               |                                                 |                                           |                                                |
| Cultural practices and activities                     |                                         |                                               |                                                 |                                           |                                                |
| Direct action / Activism                              |                                         |                                               |                                                 |                                           |                                                |
| Documenting/recording traditional and local knowledge |                                         |                                               |                                                 |                                           |                                                |
| Documentaries and movies                              |                                         |                                               |                                                 |                                           |                                                |
| Education, training                                   |                                         |                                               |                                                 |                                           |                                                |
| Engaging with natural environment                     |                                         |                                               |                                                 |                                           |                                                |
| Faith and religion                                    |                                         |                                               |                                                 |                                           |                                                |
| Memorials                                             |                                         |                                               |                                                 |                                           |                                                |
| Music, folk songs and dance                           |                                         |                                               |                                                 |                                           |                                                |
| Photography                                           |                                         |                                               |                                                 |                                           |                                                |
| Poetry                                                |                                         |                                               |                                                 |                                           |                                                |
| Psychology and therapy                                |                                         |                                               |                                                 |                                           |                                                |

|                                  |  |  |  |  |  |
|----------------------------------|--|--|--|--|--|
| Relocation and migration         |  |  |  |  |  |
| Relationship with land and sea   |  |  |  |  |  |
| Social bonds and cohesion        |  |  |  |  |  |
| Storytelling and talking circles |  |  |  |  |  |
| Other _____                      |  |  |  |  |  |
| Other _____                      |  |  |  |  |  |
| Other _____                      |  |  |  |  |  |
| Other _____                      |  |  |  |  |  |

**18. Are there any good practice examples of responding to NELD? If so, can you provide some details of this (e.g., good case studies from the region)?**

-----  
-----

**19. Overall, do you think that NELD are adequately addressed at present in the Pacific region (e.g., in policies, programmes and related initiatives)?**

☐ Not at all   ☐ A little   ☐ Moderately   ☐ Very   ☐ Extremely

**20. Please provide a reason for your responses to the above question (Q20):**

-----  
-----

**21. What challenges, if any, has your organisation encountered in addressing NELD related to climate change impacts?**

-----  
-----

**22. Please describe what you believe needs to be done (i.e. improvements to current practice or any technical needs) in the future to improve how the Pacific region identifies, plans for and addresses NELD at the following different scales?**

Local: \_\_\_\_\_

National: \_\_\_\_\_

Regional: \_\_\_\_\_

Global: \_\_\_\_\_

**23. What is your gender?**

☐ Female   ☐ Male   ☐ Non-binary   ☐ Prefer to self-identify \_\_\_\_\_   ☐ Prefer not to say

**24. Please indicate your age: \_\_\_\_\_**

**25. Please indicate your country of origin: \_\_\_\_\_**

**26. Please indicate your current country of residence: \_\_\_\_\_**

**27. If you have any other comments, please write them here: \_\_\_\_\_**

*Thank you for participating in the survey!*
